# Supplementary material for: Combination therapy with T cell engager and PD-L1 blockade enhances the antitumor potency of T cells as predicted by a QSP model
Source: PubMed Central journal article supplement (PMC7454244; doi:10.1136/jitc-2020-001141), 2020-08-27
Supplement: jitc-2020-001141supp001.pdf [file jitc-2020-001141supp001.pdf]

## Combination Therapy with T cell engager and PD-L1 Blockade Enhances the Antitumor Potency of T Cells as Predicted by a QSP Model

Huilin Ma<sup>1\*</sup>, Hanwen Wang<sup>1</sup>, Richard J. Sove<sup>1</sup>, Jun Wang<sup>3</sup>, Craig Giragossian<sup>3</sup>, Aleksander S. Popel<sup>1,2</sup>

<sup>1</sup>Department of Biomedical Engineering, Johns Hopkins University School of Medicine, Baltimore, MD, USA

<sup>2</sup>Department of Oncology and Sidney Kimmel Comprehensive Cancer Center, Johns Hopkins University, Baltimore, MD, USA

<sup>3</sup>Biotherapeutics Discovery Research, Boehringer Ingelheim Pharmaceuticals, Inc, Ridgefield, CT, USA

\*Corresponding author email: hma24@jhmi.edu

### Supplementary Information

#### 1.1 Updated Immune checkpoint blockade dynamics for atezolizumab

Immune checkpoint blockade dynamics has been described by Jafarnejad et al. (1) and was expanded here for anti-PD-L1 blockades. PD-1 expressed in T<sub>eff</sub> interacts with PD-L1 and PD-L2 on cancer cell in the immunological synapse (Eqs. 1 and 2). The formation of PD1\_PDLX (PD1\_PDL1 + PD1\_PDL2) (Eq. 6) will cause reduced cancer killing by T<sub>eff</sub>. The expression of PD-1 on T cells and PD-L1/PD-L2 on cancer cells or APCs were estimated based on measurements using quantitative flow cytometry using calibrated fluorescent beads (2, 3). Atezolizumab binding to the PD-L1 was modeled using a bivalent model of antibody receptor interaction on cell surface by introducing a cross-arm binding efficiency  $X$  (Eqs. 3,4 and 5). Relevant governing equations for the dynamics of the checkpoint molecules in the immune synapse are summarized below based on previous publications (1, 4, 5):

$$\frac{dPD1\_PDL1}{dt} = k_{on,PD1\_PDL1} \cdot PD1 \cdot PDL1 - k_{off,PD1\_PDL1} \cdot PD1\_PDL1 \quad (1)$$

$$\frac{dPD1\_PDL2}{dt} = k_{on,PD1\_PDL2} \cdot PD1 \cdot PDL2 - k_{off,PD1\_PDL2} \cdot PD1\_PDL2 \quad (2)$$

$$\frac{dPDL1\_Atezo}{dt} = 2k_{on,PDL1\_Atezo} \cdot PDL1 \cdot Atezo / f_{tum} - k_{off,PDL1\_Atezo} \cdot PDL1\_Atezo \quad (3)$$

$$\frac{dPDL1\_Atezo\_PDL1}{dt} = X \left( \frac{k_{on,PDL1\_Atezo}}{A_{syn} d_{syn} N_A} \right) \cdot PDL1\_Atezo \cdot PDL1 - 2 * k_{off,PDL1\_Atezo} \cdot PDL1\_Atezo\_PDL1 \quad (4)$$

$$\begin{aligned} \frac{dPDL1}{dt} = & -k_{on,PD1\_PDL1} \cdot PD1 \cdot PDL1 + k_{off,PD1\_PDL1} \cdot PD1_{PDL1} - 2k_{on,PD1\_Nivo} \cdot PD1 \cdot \frac{Nivo}{f_{tum}} + \\ & k_{off,PDL1\_Atezo} \cdot PDL1\_Atezo - X \left( \frac{k_{on,PDL1\_Atezo}}{A_{syn} d_{syn} N_A} \right) \cdot PDL1\_Atezo \cdot PDL1 + 2 * k_{off,PDL1\_Atezo} \cdot \\ & PDL1\_Atezo\_PDL1 \end{aligned} \quad (5)$$

where  $k_{on,PD1\_X}$  and  $k_{off,PD1\_X}$  are the on and off rates for interactions between PD-1 and X (PD-L1, PD-L2, and atezolizumab),  $f_{tum}$  is the porosity in the tumor,  $X$  is the intrinsic antibody cross-arm binding efficiency,  $A_{syn}$  is surface area of the synapse,  $d_{syn}$  is the thickness of the confinement space between the two cells, and  $N_A$  is Avogadro's number.  $k_{on,PDL1\_Atezo}$  was converted to units of  $1/(molecule \cdot s)$  using the synapse sizes ( $A_{syn} * d_{syn}$ ) and Avogadro's number  $N_A$ . The number of bound PD-L1 molecules on cancer cells or APCs was translated to Teff exhaustion using a Hill equation.

$$PD1\_PDLX\_CC = PD1\_PDL1\_CC + PD1\_PDL2\_CC \quad (6)$$

$$PD1\_PDLX\_APC = PD1\_PDL1\_APC + PD1\_PDL2\_APC \quad (7)$$

Here PD-L1/PD-L2 can be either expressed on cancer cells or APCs. PD-1/PD-L1/PD-L2 dynamics is assumed to be similar in T cell - cancer cell and T cell - APC, thus only a single checkpoint module was used in this study to reduce the size of the model. However, to differentiate the differences of PD-L1/PD-L2 expression in cancer cell and APC, Eqs. 1-5 are used simultaneously for cancer cell and APC when the simulations are running, resulting in two species  $PD1\_PDLX\_CC$  and  $PD1\_PDLX\_APC$ , which represent the number of bound PD-1 - PD-L1/PDL2 in T cell - cancer

cell and T cell – APC synapse. Then, the number was translated to Teff exhaustion using a Hill equation.

$$H_{PD1\_PDLX\_CC} = \left( 1 - \frac{PD1\_PDLX\_CC^2}{PD1\_PDLX\_CC^2 + K_{PD1\_PDLX\_CC}^2} \right) \quad (8)$$

$$H_{PD1\_PDLX\_APC} = \left( 1 - \frac{PD1\_PDLX\_APC^2}{PD1\_PDLX\_APC^2 + K_{PD1\_PDLX\_APC}^2} \right) \quad (9)$$

As we mentioned in the main paper in section 3.6, PD-L2 expression showed ambiguous results. To study the impact of PD-L2, we introduced another parameter  $\delta$  in the Hill functions (6) and (7) and added it into the parameter sensitivity analysis and assigned its range between 0 and 1.

$$PD1\_PDLX\_CC = PD1\_PDL1\_CC + \delta * PD1\_PDL2\_CC \quad (10)$$

$$PD1\_PDLX\_APC = PD1\_PDL1\_APC + \delta * PD1\_PDL2\_APC \quad (11)$$

## 1.2 Updated T cell activation and proliferation

T cells activation in TdLN is based on a two-step priming model described by Jafarnejad et al [REF]. In the main paper, the function of PD-L1/PD-L2 expression in APCs has been discussed. After naïve T cells being activated by mAPCs in the first step, the PD-L1/PD-L2 expression in APCs is assumed to limit the proliferation of activated T cells into functional effector T cell by introducing an inverse Hill function (Eq. 9).

$$TCPR = \frac{k_{aTCDB,prolif}}{n_{prolif}} \cdot 2^{n_{prolif}} \cdot T_{activated,CD8} * H_{PD1\_PDLX\_APC} \quad (12)$$

where  $TCPR$  is T cell proliferation rate,  $k_{aTCDB,prolif}$  is doubling rate of activated T cells,  $n_{prolif}$  is the number of generations T cells proliferate, and  $T_{activated,CD8}$  is the number of activated T cells in the TdLN. The number of generations that activated T cells proliferate (division destiny) before leaving

the TdLN depends on TCR engagement, co-stimulation signal through CD28, and IL-2 receptor stimulation.

### 1.3 Updated Tumor growth

Teff killing rate (TKR) is expressed as an inverse Hill equation of immune checkpoint inhibitors and T cell engagers as follows, which remains the same as reported by Ma et al. (6).

$$H\_TCE = \frac{CEACEA\_TCE\_TeffCD3^3}{CEACEA\_TCE\_TeffCD3^3 + K_{CEACEA\_TCE\_TeffCD3}^3} \quad (13)$$

$$TKR = k_{C,death,TCETeff} \frac{C \cdot T_{eff}}{C + T_{tot}} * H\_TCE + k_{C,death,Teff} \frac{C \cdot T_{eff}}{C + T_{tot}} * H\_PD1\_PDLX\_CC \quad (14)$$

The number of bound CEACEA\_TCE\_TeffCD3 was translated to cancer cell killing rate by Teff cells using a Hill equation. The immune checkpoint blockade dynamics elaborated by Jafarnejad et al. (1) was combined with T cell engager dynamics in the Teff cell killing rate (TKR).

Here  $k_{C,death,Teff}$  is basal cancer killing rate by Teff and  $k_{C,death,TCETeff}$  is additional cancer killing rate by Teff activated by TCE,  $C$  is the total number of cancer cells in the tumor compartment,  $T_{eff}$  is total number of Teff in the tumor and  $T_{tot}$  is total number of T cells in the tumor,  $CEACEA\_TCE\_TeffCD3$  is the total number of engaged CEA CD3 molecules bridged by TCE in the synapse, and  $K_{CEACEA\_TCE\_TeffCD3}$  is sensitivity of  $TKR$  to  $CEACEA\_TCE\_TeffCD3$ . Formation of  $CEACEA\_TCE\_TeffCD3$  will increase  $TKR$  according to the Hill equation ( $H\_TCE$ ), and formation of PD1\_PDLX\_CC will slow down  $TKR$  according to the inverse Hill equation. Details of TCE dynamics were provided by Ma et al. (6).

## Supplementary Figures

### Pharmacokinetics

Pharmacokinetic of atezolizumab was modelled following the same physiologically-based pharmacokinetic model as described by Jafarnejad et al. (1). The plasma concentration of atezolizumab in our model was fitted to standard pharmacokinetic two-compartment model (Fig. S1). PK parameters were fitted to the data reported and the simulated plasma concentration of atezolizumab together with the clinical measurements at dose levels of 1, 3, 10, 15 mg/kg and 1200 mg in the central compartment (7).

$Atezo_P$ ,  $Atezo_C$ ,  $Atezo_{LN}$ ,  $Atezo_T$  indicate atezolizumab concentration in peripheral, central, TdLN and tumor compartment, respectively.

$$V_C \frac{dAtezo_C}{dt} = q_P(Atezo_P - Atezo_C) + q_{LN}(Atezo_{LN} - Atezo_C) + q_T(Atezo_T - Atezo_C) + q_{LD}Atezo_{LN} - CL * Atezo_C \quad (13)$$

$$V_P \frac{dAtezo_P}{dt} = q_P(Atezo_C - Atezo_P) \quad (14)$$

$$V_T \frac{dAtezo_T}{dt} = q_T(Atezo_C - Atezo_T) - q_{LD}Atezo_T \quad (15)$$

$$V_{LN} \frac{dAtezo_{LN}}{dt} = q_{LN}(Atezo_C - Atezo_{LN}) + q_{LD}Atezo_T - q_{LD}Atezo_{LN} \quad (16)$$

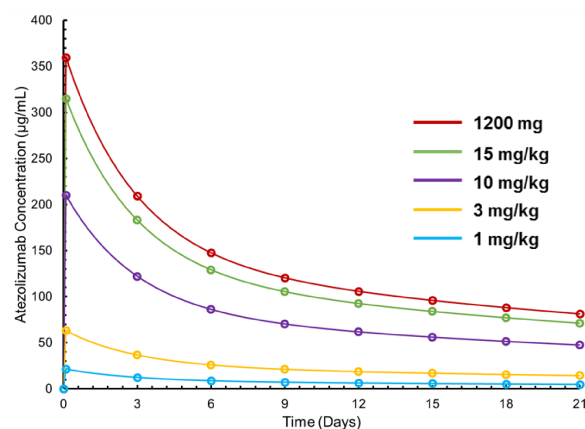

Figure S1. Simulated (solid lines) and measured (dots) atezolizumab plasma concentration.

A.

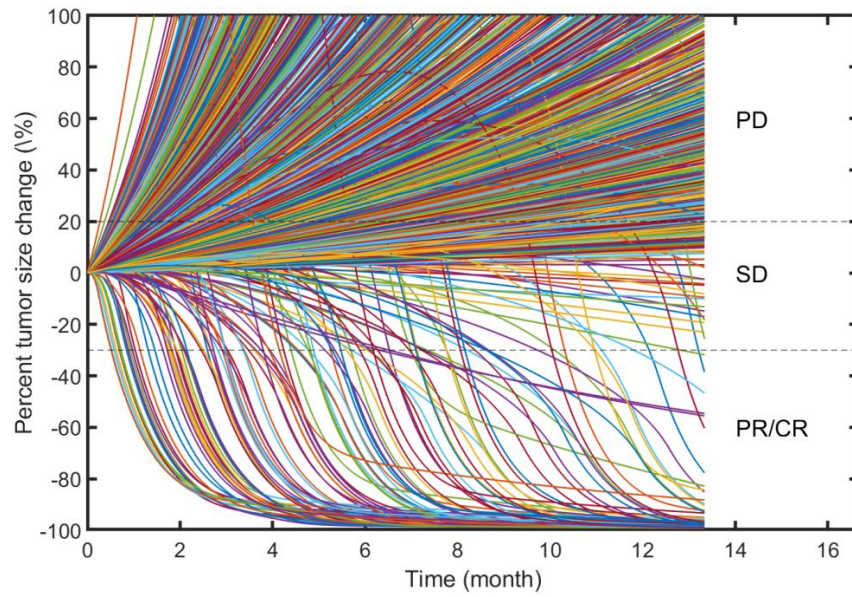

B.

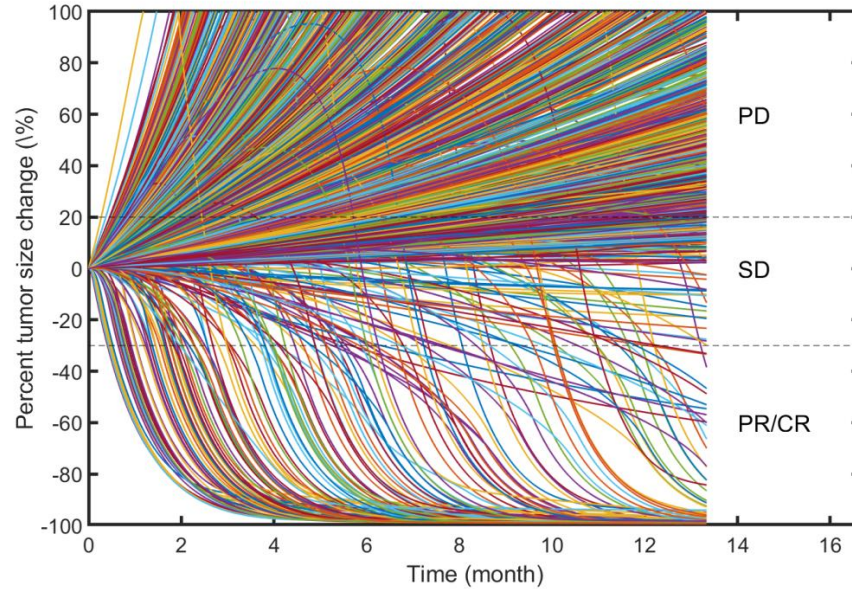

Figure S2. Percent change in tumor size represented using RECIST criteria (a “spider” plot). A. Atezolizumab monotherapy (1312 virtual patients). B. Combination therapy (1299 virtual patients).

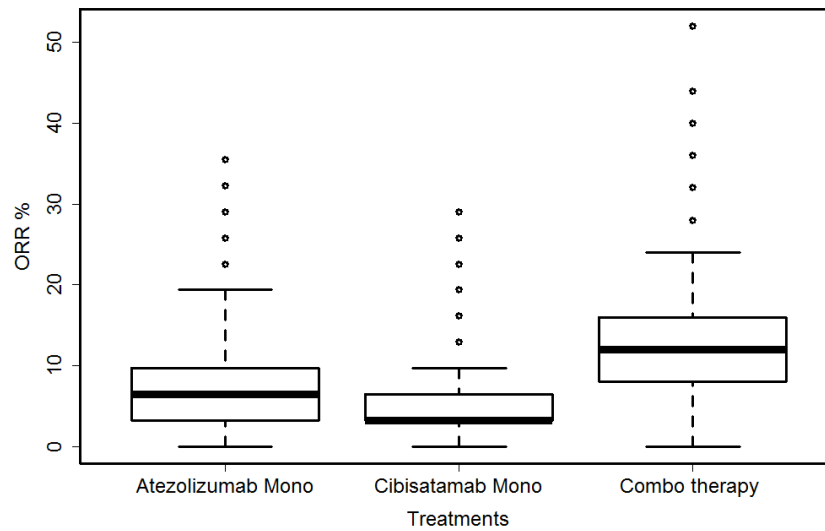

Figure S3. Bootstrapping results for atezolizumab monotherapy, cibusatamab monotherapy and combination therapy (10,000 bootstrap samples).

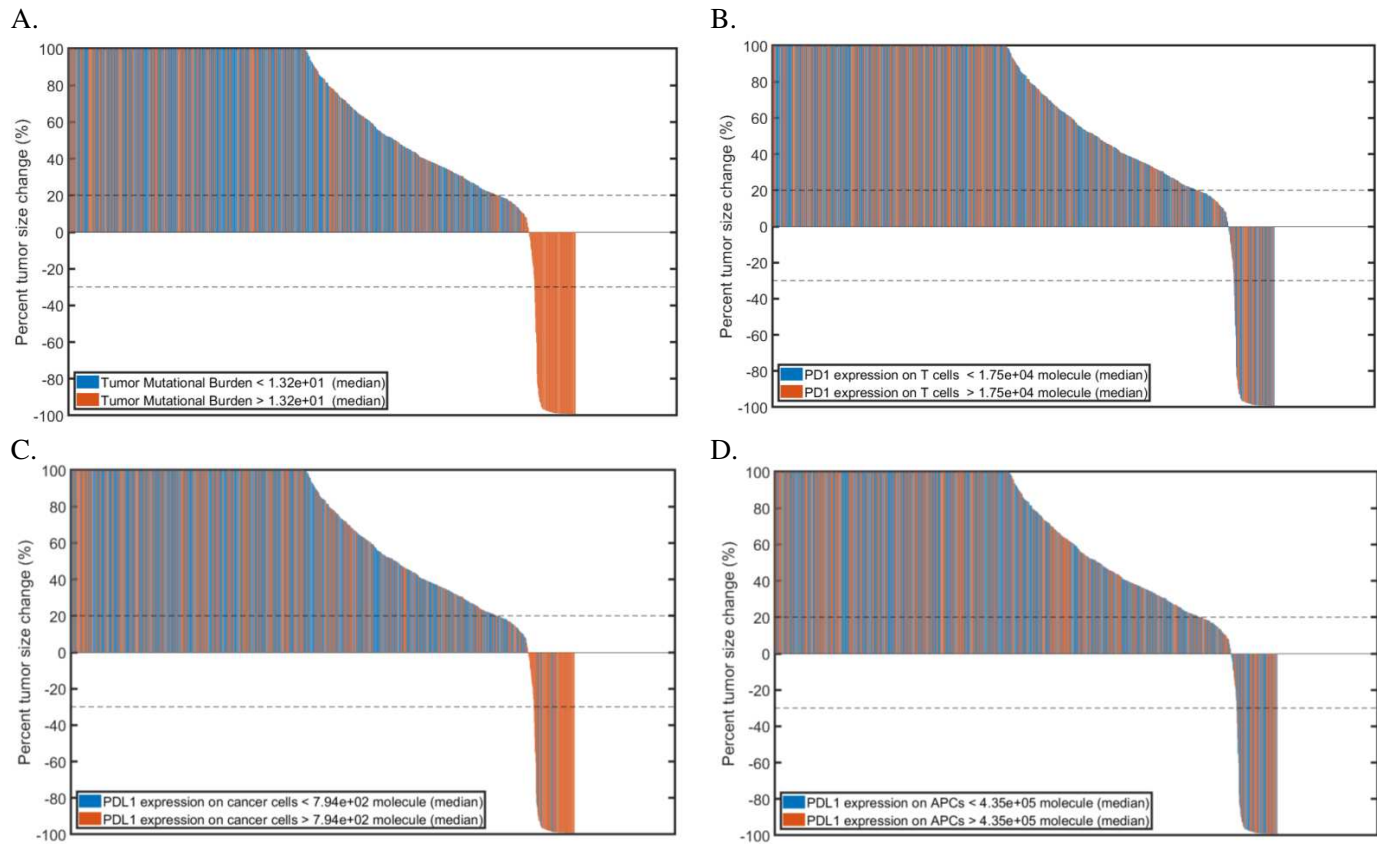

Figure S4. Waterfall plots for atezolizumab monotherapy while varying A. TMB; B. PD-1 expression; C. PD-L1 expression in cancer cell; D. PD-L1 expression in APCs.



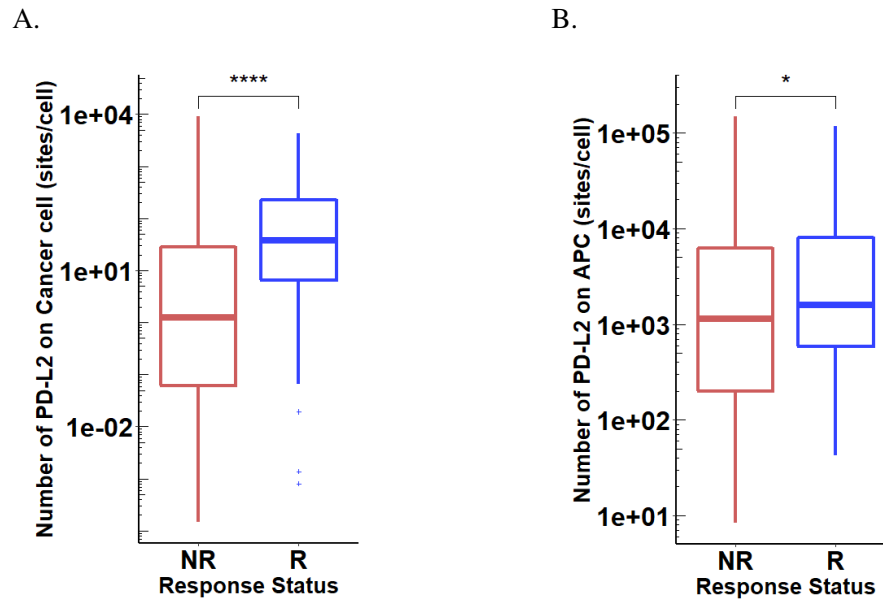

Figure S5. Distributions of potential biomarker in NR and R in atezolizumab monotherapy. A. PD-L2 expression in cancer cells; B. PD-L2 expression in APCs.

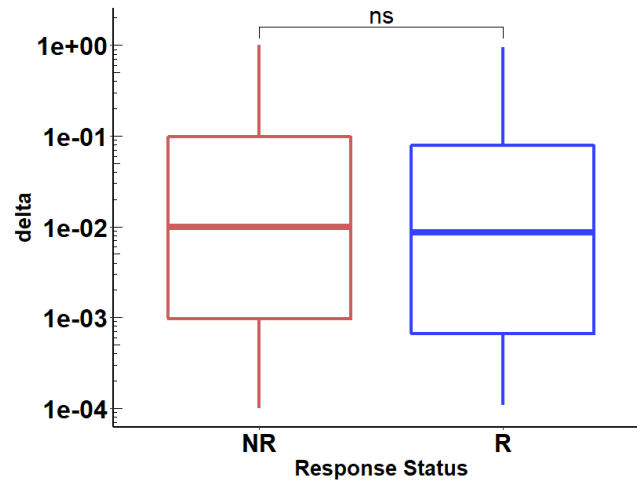

Figure S6. Distribution of  $\delta$  in NR and R of atezolizumab monotherapy.

## Supplementary Tables

**Table. S1 Abbreviations**

| <b>Abbreviation</b> | <b>Definition</b>                                   |
|---------------------|-----------------------------------------------------|
| AUC                 | Area under the curve                                |
| BsAb                | Bispecific antibodies                               |
| CEA                 | Carcinoembryonic Antigen                            |
| CEA-TCB             | Carcinoembryonic Antigen T-Cell Bispecific Antibody |
| CR                  | Complete Response                                   |
| CTLA-4              | Cytotoxic T-lymphocyte-associated protein 4         |
| EpCAM               | Epithelial cell adhesion molecule                   |
| HNSCC               | Head and neck squamous cell cancer                  |
| LHS                 | Latin hypercube sampling                            |
| mAb                 | Monoclonal antibody                                 |
| mCRC                | Metastatic Colorectal Cancer                        |
| MDSCs               | Myeloid-derived suppressor cells                    |
| MHC                 | Major Histocompatibility Complex                    |
| moTTC               | Monovalent TCEs Ternary Complex                     |
| MSS                 | Microsatellite Stable                               |
| MSI-H               | Microsatellite instability High                     |
| NSCLC               | Non-small-cell Lung Carcinoma                       |
| ORR                 | Overall response rate                               |
| PD                  | Progressive Disease                                 |
| PD-1                | Programmed cell death protein 1                     |
| PD-L1               | Programmed death-ligand 1                           |
| pMMR                | Mismatch Repair proficient                          |
| PR                  | Partial Response                                    |
| PRCC                | Partial Rank Correlation Coefficient                |
| PSA                 | Parameter Sensitivity Analysis                      |
| QSP                 | Quantitative Systems Pharmacology                   |
| RECIST              | Response evaluation criteria in solid tumors        |
| ROA                 | Responder of atezolizumab monotherapy only          |
| ROB                 | Responder of both monotherapies                     |
| ROC                 | Responder of cibisatamab monotherapy only           |
| ROCMB               | Responder of combination therapy only               |
| SBML                | Systems Biology Markup Language                     |
| SD                  | Stable Disease                                      |
| TAMs                | Tumor-associated macrophages                        |

---

| <b>Abbreviation</b> | <b>Definition</b>             |
|---------------------|-------------------------------|
| TCB                 | T Cell Bispecific             |
| TCE                 | T cell engager                |
| TCR                 | T-cell receptor               |
| TdLN                | Tumor-draining Lymph Nodes    |
| Teff                | Effector T cells              |
| TILs                | Tumor infiltrating T cells    |
| TMB                 | Tumor Mutational Burden       |
| TME                 | Tumor microenvironment        |
| TNBC                | Triple-negative breast cancer |
| Treg                | Regulatory T cells            |
| VCTs                | Virtual clinical trials       |
| VPs                 | Virtual patients              |

---

Table. S2 Atezolizumab-related Variables and Terms Used in Equations

| Parameters           | Definition                                                         | Unit          | Value (ref)    |
|----------------------|--------------------------------------------------------------------|---------------|----------------|
| C_PDL1_total         | Total PD-L1 on tumor cell                                          | sites/cell    | 160000 (3, 8)  |
| APC_PDL1_total       | Total PD-L1 on APC                                                 | sites/cell    | 1600000 (2, 3) |
| C_PDL2_total         | Total PD-L2 on tumor cell                                          | sites/cell    | 10400 (2, 9)   |
| APC_PDL2_total       | Total PD-L2 on APC                                                 | sites/cell    | 104000 (2, 9)  |
| Teff_PD1_total       | Total PD-1 on Teff cell                                            | sites/cell    | 60000 (1)      |
| Kd_PD1PDL1           | Binding affinity of PD-1/PD-L1                                     | $\mu$ M       | 8.2 (1)        |
| Kd_PD1PDL2           | Binding affinity of PD-1/PD-L2                                     | $\mu$ M       | 2.3 (1)        |
| Kd_PDL1_Atezo        | Binding affinity of PD-L1/Atezolizumab                             | nM            | 0.4 (10)       |
| $\chi$               | Intrinsic antibody cross-arm binding efficiency                    | dimensionless | 100 (4)        |
| n_PD1_PDLX           | Hill coefficient for PD1_PDLX                                      | Dimensionless | 2 (1)          |
| $K_{PD1\_PDLX\_CC}$  | Number of PD-1/PD-L1 for half maximal inhibition of T cell killing | Molecule      | 250 (1)        |
| $K_{PD1\_PDLX\_APC}$ | Number of PD-1/PD-L1 for half maximal inhibition of T cell killing | Molecule      | 250 (1)        |

  

| Species             | Definition                                       | Unit     |   |
|---------------------|--------------------------------------------------|----------|---|
| PD1_PDL1_CC         | PD1_PDL1 complex in tumor comp                   | Molecule | - |
| PD1_PDL2_CC         | PD1_PDL2 complex in tumor comp                   | Molecule | - |
| PDL1_Atezo_CC       | PDL1_Atezo complex in tumor comp                 | Molecule | - |
| PDL1_Atezo_PDL1_CC  | PDL1_Atezo_PDL1 complex in tumor comp            | Molecule | - |
| PD1_PDL1_APC        | PD1_PDL1 complex in LN comp                      | Molecule | - |
| PD1_PDL2_APC        | PD1_PDL2 complex in LN comp                      | Molecule | - |
| PDL1_Atezo_APC      | PDL1_Atezo complex in LN comp                    | Molecule | - |
| PDL1_Atezo_PDL1_APC | PDL1_Atezo_PDL1 complex in LN comp               | Molecule | - |
| V_LN.T1             | Total T cells in the LN comp                     | Cell     | - |
| V_T.T1              | Total T cells in the Tumor comp                  | Cell     | - |
| V_C.T1              | Total T cells in the central comp                | Cell     | - |
| V_P.T1              | Total T cells in the Peripheral comp             | Cell     | - |
| V_LN.Atezo          | Concentration of Atezolizumab in LN comp         | M        | - |
| V_T.Atezo           | Concentration of Atezolizumab in tumor comp      | M        | - |
| V_C.Atezo           | Concentration of Atezolizumab in central comp    | M        | - |
| V_P.Atezo           | Concentration of Atezolizumab in Peripheral comp | M        | - |

**Table. S3 Parameter Values and Ranges Used in the Sensitivity Analysis**

| <b>Parameter</b>                              | <b>Baseline Value</b> | <b>Sensitivity test range</b> | <b>Unit</b>   |
|-----------------------------------------------|-----------------------|-------------------------------|---------------|
| Tumor Growth Rate                             | 0.005                 | 0-0.05                        | 1/day         |
| Rate of cancer death by NK cell               | 0.00001               | 0.00001-0.001                 | 1/day         |
| Rate of T cell exhaustion by cancer cell      | 0.1                   | 0.05-0.5                      | 1/day         |
| Rate of cancer death by T cell                | 3                     | 1-8                           | 1/day         |
| Rate of Teff inhibition by Treg               | 1                     | 0.1-1                         | 1/day         |
| $K_D$ of Ag-MHC                               | 4.0E-08               | 4E-10 - 4E-6                  | M             |
| Number of Ag Clones (TMB)                     | 10                    | 0 – 2.5E4                     | dimensionless |
| Initial Tumor Diameter                        | 3                     | 0.5-5                         | cm            |
| CEA expression in cancer cell                 | 20000                 | 1000-300000                   | molecule      |
| CD3 expression in cancer cell                 | 61000                 | 30000-90000                   | molecule      |
| CD3 expression in cancer cell                 | 61000                 | 30000-90000                   | molecule      |
| Rate of Tumor Death by TCE activated Teff     | 1                     | 1-10                          | molecule      |
| Rate of TCE activated Treg Inhibition of Teff | 2                     | 0.1-10                        | 1/day         |
| koff of CEA TCE                               | 0.00013               | 0.000001-0.001                | 1/s           |
| koff of CD3 TCE                               | 0.00075               | 0.00001-0.01                  | 1/s           |
| $\lambda$                                     | 1000                  | 0.001-100000                  | dimensionless |
| Total PD-1 on tumor T cell                    | 60000                 | 3000-100000                   | molecule      |
| Total PD-L1 on tumor cell                     | 160000                | 1-160000                      | molecule      |
| Ratio of PD-L2/PD-L1 on tumor cell            | 0.1                   | 0-0.07                        | dimensionless |
| Total PD-L1 on APC                            | 1600000               | 80000-2400000                 | molecule      |
| Ratio of PD-L2/PD-L1 on APC                   | 0.1                   | 0-0.07                        | dimensionless |
| $\chi$                                        | 100                   | 0.001-100000                  | dimensionless |

**Table S4. Overall Response Rate**

| Treatments            | Simulated ORR (%) | 95% CI        | Clinical ORR (%) (11) |
|-----------------------|-------------------|---------------|-----------------------|
| Cibisatamab (TCE)     | 5.2               | (0.0%, 19.4%) | 6                     |
| Atezolizumab (aPD-L1) | 8.2               | (0.0%, 12.9%) | N/A                   |
| Combination Therapy   | 11.2              | (0.0%, 24.0%) | 12                    |

**Table S5. Distribution of Overall Response Rate in Bootstrapping samples**

| ORR range (%) | Atezolizumab | Cibisatamab | Combo |
|---------------|--------------|-------------|-------|
| 0-3           | 7%           | 18%         | 5%    |
| 3-6           | 20%          | 33%         | 17%   |
| 6-9           | 26%          | 27%         | 25%   |
| 9-12          | 23%          | 14%         | 24%   |
| 12-15         | 14%          | 5%          | 16%   |
| 15-18         | 6%           | 2%          | 8%    |
| >18           | 4%           | 1%          | 5%    |

## REFERENCES

1. Jafarnejad M, Gong C, Gabrielson E, Bartelink IH, Vicini P, Wang B, et al. A Computational Model of Neoadjuvant PD-1 Inhibition in Non-Small Cell Lung Cancer. *Aaps Journal*. 2019;21(5).
2. Cheng XX, Veverka V, Radhakrishnan A, Waters LC, Muskett FW, Morgan SH, et al. Structure and Interactions of the Human Programmed Cell Death 1 Receptor. *J Biol Chem*. 2013;288(17):11771-85.
3. Mkrtichyan M, Najjar YG, Raulfs EC, Liu L, Langerman S, Guittard G, et al. B7-DC-Ig enhances vaccine effect by a novel mechanism dependent on PD-1 expression level on T cell subsets. *The Journal of Immunology*. 2012;189(5):2338-47.
4. Harms BD, Kearns JD, Iadevaia S, Lugovskoy AA. Understanding the role of cross-arm binding efficiency in the activity of monoclonal and multispecific therapeutic antibodies. *Methods*. 2014;65(1):95-104.
5. Betts A, Haddish-Berhane N, Shah DK, van der Graaf PH, Barletta F, King L, et al. A Translational Quantitative Systems Pharmacology Model for CD3 Bispecific Molecules: Application to Quantify T Cell-Mediated Tumor Cell Killing by P-Cadherin LP DART((R)). *Aaps Journal*. 2019;21(4).
6. Ma H, Wang H, Sové RJ, Jafarnejad M, Tsai C-H, Wang J, et al. A Quantitative Systems Pharmacology Model of T Cell Engager Applied to Solid Tumor. *Aaps Journal*. 2020;22(4):85.
7. Stroh M, Winter H, Marchand M, Claret L, Eppler S, Ruppel J, et al. Clinical pharmacokinetics and pharmacodynamics of atezolizumab in metastatic urothelial carcinoma. *Clin Pharmacol Ther*. 2017;102(2):305-12.

8. Yarchoan M, Albacker LA, Hopkins AC, Montesion M, Murugesan K, Vithayathil TT, et al. PD-L1 expression and tumor mutational burden are independent biomarkers in most cancers. *Jci Insight*. 2019;4(6).
9. Taube JM, Klein A, Brahmer JR, Xu HY, Pan XY, Kim JH, et al. Association of PD-1, PD-1 Ligands, and Other Features of the Tumor Immune Microenvironment with Response to Anti-PD-1 Therapy. *Clin Cancer Res*. 2014;20(19):5064-74.
10. Herbst RS, Soria J-C, Kowanetz M, Fine GD, Hamid O, Gordon MS, et al. Predictive correlates of response to the anti-PD-L1 antibody MPDL3280A in cancer patients. *Nature*. 2014;515(7528):563-7.
11. Tabernero J, Melero I, Ros W, Argiles G, Marabelle A, Rodriguez-Ruiz ME, et al. Phase Ia and Ib studies of the novel carcinoembryonic antigen (CEA) 1-cell bispecific (CEA CD3 TCB) antibody as a single agent and in combination with atezolizumab: Preliminary efficacy and safety in patients with metastatic colorectal cancer (mCRC). *J Clin Oncol*. 2017;35.
